# Supplementary material
Source: Springer Nature journal article supplement (https://www.springermedizin.de/resource/supplementary/12876_2014_1089_MOESM3_ESM.pdf/9438464)

## McGill Short Form Pain Questionnaire

**A**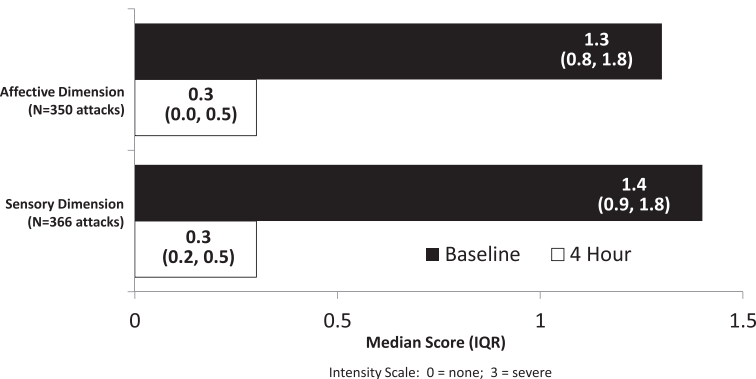**B**

## Visual Analog Pain Intensity Scale

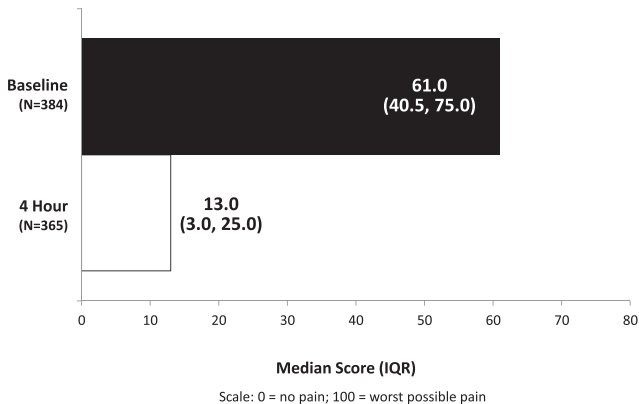

Supplement: MOESM3 [file 9438464]
